# Supplementary material for: Exceptional wildfire smoke over Greece in summer 2023: a synergistic study of aerosol optical-microphysical and UVB radiative impacts
Source: Copernicus journal article supplement (doi:10.5194/egusphere-2025-5856), 2025-12-05
Supplement: Supplementary file 1 [file egusphere-2025-5856-supplement.pdf]

# Exceptional wildfire smoke over Greece in summer 2023: a synergistic study of aerosol optical-microphysical and UVB radiative impacts

## Supplementary Material

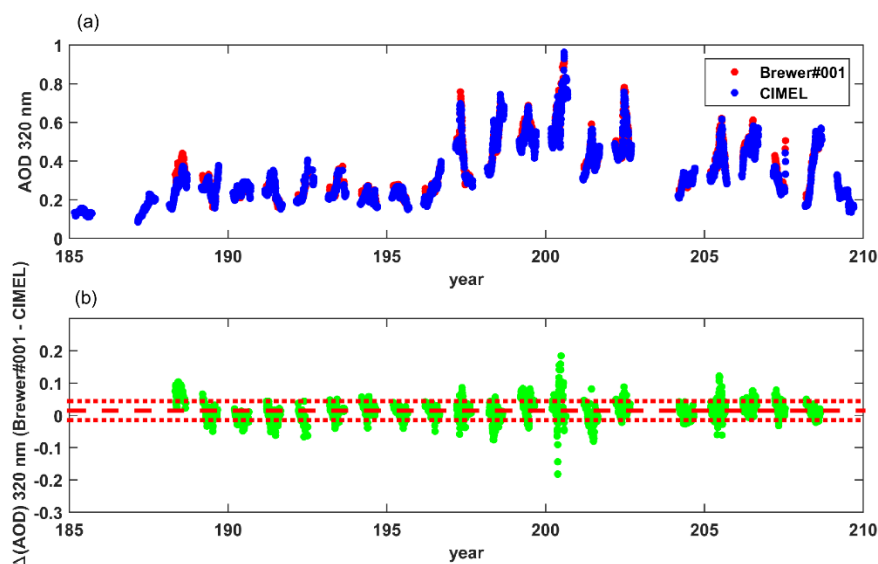

**Figure S1.** a) Time series of AOD from Brewer (red) and CIMEL (blue) for the period 2023–2025. (b) Difference  $\Delta(\text{AOD})$  between Brewer and CIMEL AOD, for July - August 2023.

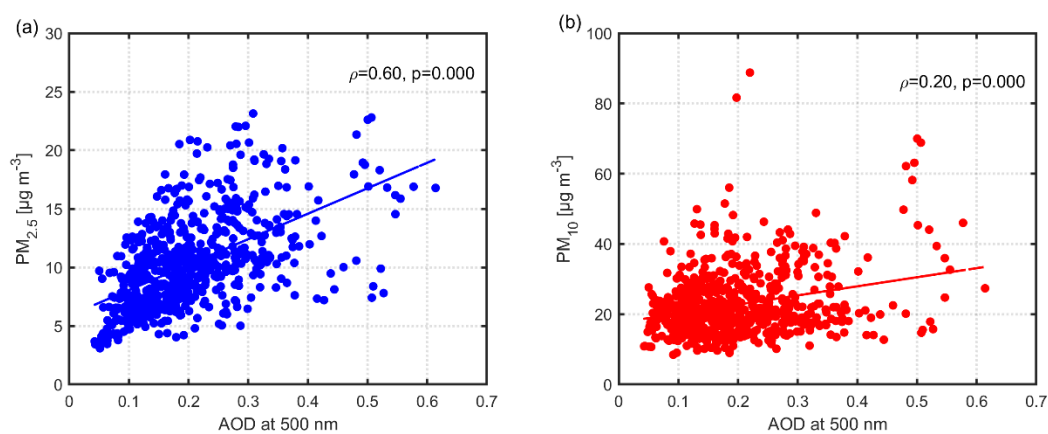

**Figure S2.** Spearman correlation between hourly (a) PM<sub>2.5</sub> and (b) PM<sub>10</sub> concentrations and AOD at 500 nm during July and August 2023.

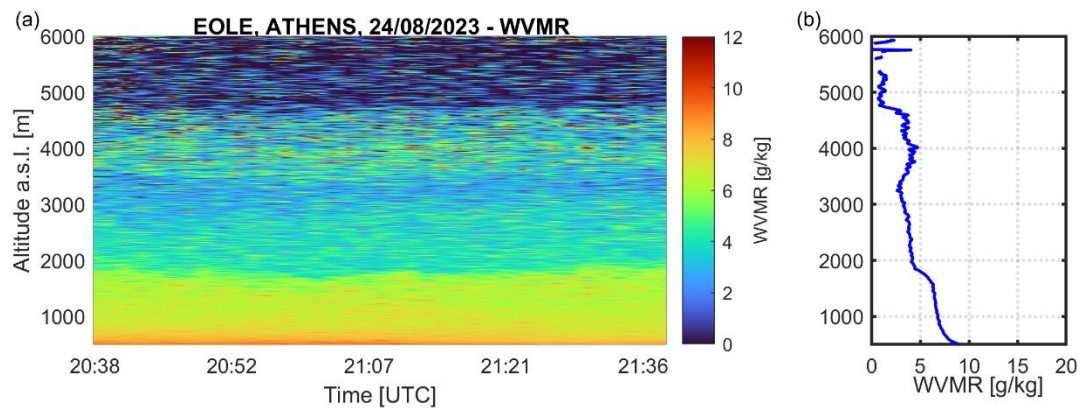

**Figure S3.** (a) Spatio-temporal evolution of the Water Vapor Mixing Ratio (WVMR) and (b) vertical profile of the WVMR obtained by EOLE lidar on 24 August 2023.

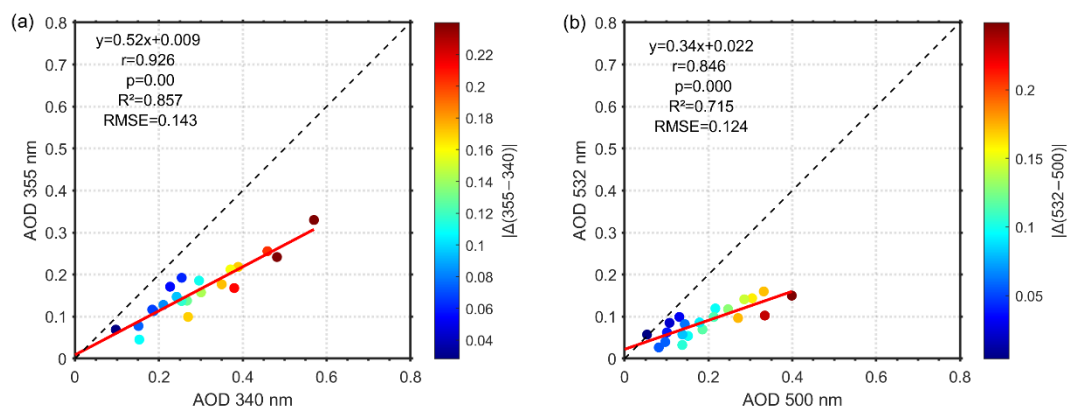

**Figure S4.** Comparison of layer-integrated AOD retrieved from the lidar with CIMEL sun-photometer measurements. (a) 355 nm (Lidar) vs. 340 nm (CIMEL) and (b) 532 nm (Lidar) vs. 500 nm (CIMEL).
